# Supplementary material for: Non-reciprocal robotic metamaterials
Source: PubMed Central journal article supplement (PMC6787071; doi:10.1038/s41467-019-12599-3), 2019-10-10
Supplement: 41467_2019_12599_MOESM5_ESM.pdf [file 41467_2019_12599_MOESM5_ESM.pdf]

**Editorial Note:** This manuscript has been previously reviewed at another journal that is not operating a transparent peer review scheme. This document only contains reviewer comments and rebuttal letters for versions considered at *Nature Communications*. Mentions of the other journal have been redacted.

Reviewers' Comments:

Reviewer #1:

Remarks to the Author:

All my comments have been satisfactorily addressed and this paper is ready for publication.
